# Supplementary material for: A nanobody-based toolset to investigate the role of protein localization and dispersal in Drosophila
Source: eLife. 2017 Apr 11;6:e22549. doi: 10.7554/eLife.22549 (PMC5388529; doi:10.7554/eLife.22549)
Supplement: Figure 1—figure supplement 2—source data 1. — Only male wings were used. Intervein area IV4-5 in µm2 as indicated in pannel A. DOI: http://dx.doi.org/10.7554/eLife.22549.005 [file elife-22549-fig1-figsupp2-data1.xlsx]

## Sheet: Sheet1
Figure 1 - Figure Supplement 2: Source data for wing area quantification
Only male wings were used. Intervein area IV4-5 in um^2 as indicated in pannel A.
		hh::Gal4 x
Sample	yw (control)	GrabFP-BExt	GrabFP-Aext	morphotrap	GrabFP-ECM
1	0.528	0.535	0.476	0.499	0.522
2	0.494	0.503	0.481	0.487	0.48
3	0.521	0.512	0.494	0.49	0.478
4	0.425	0.541	0.495	0.479	0.493
5	0.497	0.541	0.464	0.484	0.477
6	0.495	0.509	0.481	0.489	0.479
7	0.489	0.511	0.492	0.507	0.465
8	0.478	0.505	0.471	0.486	0.484
9	0.519	0.538	0.5	0.499	0.494
10	0.428	0.527	0.467	0.483	0.458
11	0.446	0.534	0.443	0.505	0.498
12	0.47	0.542	0.492	0.466	0.497
13	0.53	0.53	0.513	0.502	0.495
14	0.507	0.533	0.436	0.47	0.491
15	0.51	0.554	0.527	0.49	0.511
16	0.511	0.53	0.48	0.496	0.499
17	0.51	0.529	0.498	0.483	0.514
18	0.532	0.51	0.459	0.504	0.504
19	0.474	0.532	0.479	0.49	0.516
20	0.482	0.417	0.476	0.502	0.518
21		0.426	0.478	0.503	0.523
22		0.413	0.467	0.492	0.517
23		0.4	0.525	0.501	0.517
24		0.429	0.472	0.504
25		0.39	0.457	0.491
26		0.389	0.48	0.482
27		0.388	0.466	0.512
28		0.388	0.481	0.471
29		0.391	0.508	0.503
30		0.394	0.478	0.493
31		0.456	0.486	0.479
32		0.558	0.512	0.515
33		0.45	0.488	0.496
34		0.538	0.481	0.487
35		0.532		0.53
36		0.434		0.502
37		0.493		0.513
38		0.526		0.486
39				0.511
40				0.51
41				0.477
42
Outlier			0.539	0.541
Average	0.4923	0.484947	0.482441	0.494366	0.496957
t-test		0.610471	0.168979	0.721235	0.553088
