# Supplementary material for: A nanobody-based toolset to investigate the role of protein localization and dispersal in Drosophila
Source: eLife. 2017 Apr 11;6:e22549. doi: 10.7554/eLife.22549 (PMC5388529; doi:10.7554/eLife.22549)
Supplement: Figure 2—figure supplement 2—source data 1. — DOI: http://dx.doi.org/10.7554/eLife.22549.010 [file elife-22549-fig2-figsupp2-data1.xlsx]

## Sheet: Sheet1
Figure2 - Supplementary Figure 2: Source data pannels C-E
Pannel C-D
			Replicate
			1	2	3	4	5
Experiment	eGFP	vhhGFP4	Average fluorescence					Average	SD	t-test
1	54 nM	-	79.65	80.7	79.06	83.02	83.517
2	54 nM	-	81.856	82.747	82.017	77.846	80.773	81.1186	1.75412
3	-	54 nM	0.0499	0.0783	0.174	0.0652	0.0899	0.09146	0.0433712	6.2467e-20
4	54 nM	5 nM	81.184	80.204	81.701	81.53	79.611	80.846	0.80629	0.763215
5	55 nM	27 nM	81.573	80.052	78.217		88.841	82.1707	4.03022	0.540738
6	56 nM	54 nM	105.82	101.688	104.521	105.3	103.824	104.231	1.44113	4.37999e-12
7	57 nM	108 nM	115.633	121.858	119.587	125.642	122.013	120.947	3.2893	4.26881e-13
8	58 nM	216 nM	120.44	121.004	120.195	120.377	121.76	120.755	0.570567	9.21943e-16
		Relative changes of experiments 7 and 8 (saturating conditions) to control (1 and 2)
			1.43193	1.4911	1.48484	1.56207	1.48534
			1.49146	1.48065	1.49239	1.49661	1.48226
Pannel E - Linear regression
eGFP
concentration	Av. Fluores.	SD
108 nM	242.45	17.18
81 nM	189.86	30.5
54 nM	132.78	27.86
43.2 nM	101.9	24.374
