# Supplementary material for: A nanobody-based toolset to investigate the role of protein localization and dispersal in Drosophila
Source: eLife. 2017 Apr 11;6:e22549. doi: 10.7554/eLife.22549 (PMC5388529; doi:10.7554/eLife.22549)
Supplement: Figure 4—source data 1. — DOI: http://dx.doi.org/10.7554/eLife.22549.014 [file elife-22549-fig4-data1.xlsx]

## Sheet: Sheet1
Figure 4: Source data for apical surface area
Sample	Control	Experiment		Control = sqh/Y; Sqh-GFP
1	7.05	47.959		Experiment = sqh/Y; Sqh-GFP + GrabFP-BInt
2	6.355	35.349
3	5.66	89.365
4	6.206	112.301
5	6.156	51.037
6	7.894	65.385
7	5.759	40.115
8	7.298	85.393
9	5.461	38.725
10	3.376	89.216
11	5.908	35.696
12	5.56	62.506
13	6.107	70.499
14	7.298	33.065
15	6.305	70.548
16	4.716	54.214
17	4.965	32.767
18	4.965	38.576
19	6.553	26.909
20	6.057	46.519
21	6.107	68.016
22	4.27	55.158
23	5.163	42.845
24	5.56	46.221
25	4.716	24.675
26	4.716	56.051
27	5.809	44.732
28	4.766	27.653
29	5.362	22.391
30	6.603	14.795
31	5.163	30.384
32	7.248	32.022
33	8.192	38.824
34	3.575	62.605
35	4.915	22.44
36	9.632	21.547
37	2.532	20.554
38	3.376	35.2
39	5.362	42.001
40	5.362	22.043
41	4.319	56.995
42	4.319	25.32
43	4.816	25.171
44	4.965	19.263
45	5.312	54.214
46	3.128	57.69
47	6.603	25.717
48	5.461	27.207
49	5.213	78.144
50	4.617	85.641
51	4.17	88.967
52	4.617	56.349
53	4.617	58.037
54	7.149	47.363
55	5.461	35.795
56	6.702	33.512
57	5.908	25.816
58	3.525	37.781
59	5.908	63.796
60	6.107	92.393
61	5.461	29.441
62	5.362	44.583
63	7.497	68.662
64	5.114	133.104
65	5.114	75.166
66	3.823	103.713
67	5.709	63.548
68	6.404	35.944
69	6.404	47.562
70	5.114	98.4
71	3.624	66.279
72	4.468	38.625
73	5.461	40.512
74	6.504	70.201
75	3.326	39.32
76	7.993	26.66
77	5.809	33.015
78		37.335
79		40.711
Average	5.50886	49.9273
t-test		1.03682e-34
