# Supplementary material for: A nanobody-based toolset to investigate the role of protein localization and dispersal in Drosophila
Source: eLife. 2017 Apr 11;6:e22549. doi: 10.7554/eLife.22549 (PMC5388529; doi:10.7554/eLife.22549)
Supplement: Figure 7—source data 1. — Only male wing discs and wings were included in the quantification. DOI: http://dx.doi.org/10.7554/eLife.22549.019 [file elife-22549-fig7-data1.xlsx]

## Sheet: Sheet1
Figure 7 - Source data: wing pouch area and IV4-5 area
Only male wing discs and wings were included in the quantification
Pannel L						Pannel P - IV4-5 area
	Posterior pouch area [um^2]						Control	morphotrap		GrabFP-BExt
Sampe	Control	morphotrap	GrabFP-BExt			Sampe	Absolut [um^2]	Absolut [um^2]	relative	Absolut [um^2]	relative
1	3362	1206	1123			1	0.74	0.507	0.727925	0.4	0.5743
2	3135	1087	1044			2	0.653	0.495	0.710696	0.397	0.569993
3	3088	863	1009			3	0.772	0.377	0.541278	0.337	0.483848
4	3681	626	1422			4	0.738	0.344	0.493898	0.522	0.749462
5	2927	1093	933			5	0.619	0.312	0.447954	0.557	0.799713
6	2419	681	1180			6	0.682	0.344	0.493898	0.438	0.628859
7	2893	927	955			7	0.759	0.454	0.651831	0.434	0.623116
8	2659	1129	1277			8	0.733	0.378	0.542714	0.497	0.713568
9	2382	1512	1106			9	0.65			0.422	0.605887
10		1318	1232			10	0.619			0.42	0.603015
11			1283			11				0.33	0.473798
12			800
Median	2927	1090	1114.5			Average	0.6965	0.401375		0.432182
t-test to control		1.47857e-09	3.20722e-11			t-test to Ctrl.		5.92747e-08		1.72987e-08
t-test morphotrap
vs. GrabFP-B			0.482031
