# Supplementary material for: A nanobody-based toolset to investigate the role of protein localization and dispersal in Drosophila
Source: eLife. 2017 Apr 11;6:e22549. doi: 10.7554/eLife.22549 (PMC5388529; doi:10.7554/eLife.22549)
Supplement: Figure 8—source data 1. — Only male wing discs and wings were included in the quantification. DOI: http://dx.doi.org/10.7554/eLife.22549.022 [file elife-22549-fig8-data1.xlsx]

## Sheet: Sheet1
Figure 8 - Source data: wing pouch and blade areas
Only male wing discs and wings were included in the quantification
Pannel G - Wing pouch area						Pannel K - Wing blade area
	Pouch area [um^2]						Pouch area [mm^2]
	Control	GrabFP-ECM					Control	GrabFP-ECM
Sampe	Absolut	Absolut	relative to Ctrl.			Sampe	Absolut	Absolut	relative to Ctrl.
1	9937	8694	0.950787			1	1.33	1.236	0.889209
2	8873	6422	0.702318			2	1.558	1.258	0.905036
3	9144	6028	0.65923			3	1.481	1.568	1.12806
4	10697	10657	1.16546			4	1.268	1.121	0.806475
5	8814	7911	0.865157			5	1.336	1.406	1.01151
6	6647	5529	0.604659			6	1.444	0.982	0.706475
7	9485	5676	0.620735			7	1.454	0.93	0.669065
8	9560	5126	0.560586			8	1.294	1.207	0.868345
9	8107	8965	0.980424			9	1.273	1.01	0.726619
10		7944	0.868766			10	1.513	1.357	0.976259
11						11		1.463	1.05252
12						12		1.409	1.01367
Median	9144	7166.5						0.971	0.698561
t-test		0.025449
						Median	1.39	1.236
						t-test		0.0291244
Pannel N - Intervein area
Only female wings were included in the quantification
	Area [mm^2]							Area [mm^2]					Relative
Control	L1	L2	L3	L4	L5		GrabFP-ECM	L1	L2	L3	L4	L5	L1	L2	L3	L4	L5
1	0.18	0.265	0.275	0.381	0.351		1	0.183	0.19	0.241	0.256	0.357	1.00826	0.791667	0.914611	0.755831	1.04203
2	0.175	0.238	0.254	0.325	0.32		2	0.203	0.219	0.286	0.207	0.355	1.11846	0.9125	1.08539	0.61116	1.03619
3	0.188	0.271	0.296	0.37	0.38		3	0.216	0.263	0.304	0.323	0.398	1.19008	1.09583	1.1537	0.953646	1.1617
4	0.193	0.25	0.29	0.363	0.368		4	0.131	0.228	0.245	0.284	0.254	0.721763	0.95	0.929791	0.8385	0.741389
5	0.176	0.224	0.228	0.29	0.32		5	0.23	0.189	0.27	0.334	0.386	1.26722	0.7875	1.02467	0.986123	1.12668
6	0.193	0.188	0.275	0.304	0.353		6	0.178	0.128	0.179	0.22	0.301	0.980716	0.533333	0.679317	0.649542	0.878576
7	0.153	0.253	0.263	0.383	0.344		7	0.166	0.183	0.236	0.291	0.317	0.914601	0.7625	0.895636	0.859167	0.925277
8	0.206	0.265	0.278	0.352	0.36		8	0.164	0.171	0.188	0.18	0.297	0.903581	0.7125	0.713472	0.531444	0.8669
9	0.179	0.221	0.248	0.313	0.326		9	0.175	0.233	0.279	0.336	0.336	0.964187	0.970833	1.05882	0.992028	0.980736
10	0.172	0.225	0.228	0.306	0.304		10	0.209	0.231	0.298	0.356	0.363	1.15152	0.9625	1.13093	1.05108	1.05954
							11	0.2	0.227	0.264	0.333	0.395	1.10193	0.945833	1.0019	0.983171	1.15295
Average	0.1815	0.24	0.2635	0.3387	0.3426
							Average	0.186818	0.205636	0.253636	0.283636	0.341727	1.0293	0.856818	0.962567	0.837427	0.997453
							t-test	0.598889	0.0258441	0.515775	0.0202111	0.957617
